# Supplementary material
Source: Research Square preprint supplement (doi:10.21203/rs.3.rs-9366540/v1)
Supplement: Supplementary file 1 [file ebb307e3c113b5faf84596c0.docx]

A MagLev-Raman module for rapid and seamless in-situ analysis of composition, concentration, morphology, and size of sub-10 μm microplastic mixtures in water

*Zhiyang Peia, Zhigang Tana, Yumeng Wanga, Fengcai Leib*, Xiaodong Lic, Mingrui Shaoa, Xiaofei Zhaoa, Zhen Lia, Chao Zhanga*, Tuan Guod* and Jing Yua**

*a Shandong Provincial Key Laboratory of Light Field Manipulation Physics and Applications, School of Physics and Optoelectronics, Shandong Normal University, Jinan 250014, China.*

*b College of Chemistry, Chemical Engineering and Materials Science, Institute of Biomedical Sciences, Shandong Normal University, Jinan 250014, China.*

*c Max Planck Institute of Microstructure Physics, Weinberg 2, Halle 06120, Germany.*

*d Institute of Photonics Technology, Jinan University, Guangzhou 510632, China.*

**Corresponding e-mails: leifc@sdnu.edu.cn,* [*czsdnu@126.com*](mailto:czsdnu@126.com)*, tuanguo@jnu.edu.cn,* [*yujing1608@126.com*](mailto:yujing1608@126.com)

**KEYWORDS**: Microplastic analysis; Magnetic levitation; *In*-*situ* Raman; Water pollution

Catalogue

[1. Experimental 4](#_Toc224314231)

[1.1 Materials 4](#_Toc224314232)

[1.2 How to realize the MagLev 4](#_Toc224314233)

[1.3 Simulation of magnetic field distribution 5](#_Toc224314234)

[1.4 Estimation of the recovery rate and enrichment time 6](#_Toc224314235)

[1.5 Preparation of grating sidewall 6](#_Toc224314236)

[1.6 In-situ Raman spectra collection and imaging 7](#_Toc224314237)

[2. Supplementary note 8](#_Toc224314238)

[Note 1 Mechanism and advantage of off-axial MagLev module using single ring-shaped magnet 8](#_Toc224314239)

[Note 2 Separation degree for multiple microparticles 10](#_Toc224314240)

[Note 3 Adsorption capacity test of PS microsphere 10](#_Toc224314241)

[Note 4 Raman intensity of the probe vs the number 11](#_Toc224314242)

[Note 5 Equivalent size estimation 11](#_Toc224314243)

[Note 6 Workflow for using the MagLev-Raman module 14](#_Toc224314244)

[Note 7 Detection in the real seawater 15](#_Toc224314245)

[3. Figures and tables 17](#_Toc224314246)

[Figure S1 17](#_Toc224314247)

[Figure S2 17](#_Toc224314248)

[Figure S3 18](#_Toc224314249)

[Figure S4. 18](#_Toc224314250)

[Figure S5. 19](#_Toc224314251)

[Figure S6. 19](#_Toc224314252)

[Figure S7 20](#_Toc224314253)

[Figure S8 20](#_Toc224314254)

[Figure S9. 21](#_Toc224314255)

[Figure S10. 21](#_Toc224314256)

[Figure S11. 22](#_Toc224314257)

[Figure S12. 23](#_Toc224314258)

[Figure S13. 24](#_Toc224314259)

[Figure S14. 24](#_Toc224314260)

[Figure S15. 24](#_Toc224314261)

[Figure S16. 25](#_Toc224314262)

[Figure S17. 25](#_Toc224314263)

[Figure S18. 25](#_Toc224314264)

[Figure S19. 26](#_Toc224314265)

[Figure S20. 26](#_Toc224314266)

[Figure S21. 27](#_Toc224314267)

[Figure S22. 27](#_Toc224314268)

[Figure S23. 28](#_Toc224314269)

[Figure S24. 29](#_Toc224314270)

[Figure S25. 30](#_Toc224314271)

[Figure S26. 31](#_Toc224314272)

[Figure S27. 31](#_Toc224314273)

[Figure S28. 32](#_Toc224314274)

[Figure S29. 32](#_Toc224314275)

[References 35](#_Toc224314276)

1. Experimental

**1.1 Materials**

Ring neodymium-iron-boron (NdFeB) permanent magnets (inner diameter: 20 mm, outer diameter: 60 mm, thickness: 20 mm; magnetic flux density: 1.25 T) were purchased from Lulang Magnetic Materials Co., Ltd. High-transparency cylindrical fused quartz tubes (diameter: 15 mm, height: 50 mm) and custom-made high-transparency square-channel quartz containers (15 mm × 15 mm × 50 mm) were obtained from Pinbo Optical Quartz Co., Ltd. Adjustable-angle acrylic holders were sourced from Wuxi AutoTech. Polystyrene (PS) microspheres with nominal diameters of 10 μm, 5 μm, 2 μm, 1 μm, and 500 nm were procured from Jiangsu Zhichuan Technology. Similarly sized microspheres composed of polylactic acid (PLA), poly(methyl methacrylate) (PMMA), poly(ethylene terephthalate) (PET), and poly(vinyl chloride) (PVC) were acquired from Dongguan Hongcheng Polymer Materials Co., Ltd. Manganese(II) chloride tetrahydrate (MnCl₂·4H₂O, analytical reagent grade, ≥99.8%), polydimethylsiloxane (PDMS, analytical reagent grade, ≥99.5%), and crosslinking agents were supplied by Aladdin Biochemical Technology (Shanghai). Silicon-based periodic grating array templates were obtained from Zhengzhou Micro-Nano Semiconductor Service Co., Ltd., Henan Province.

**1.2 How to realize the MagLev**

In this study, magnetic levitation of all microplastic samples was achieved using a single ring-shaped permanent magnet as the sole magnetic field source, with the entire process recorded by a digital camera. Two distinct operational configurations were employed: axial levitation and off-axial levitation.

For axial levitation, the working region was positioned directly above the central axis of the ring magnet (*i.e.*, at coordinates *x* = 0 mm, *y* = 0 mm on the magnet’s upper surface). A quartz sample cell—either cylindrical or cuboidal—filled with a concentrated aqueous MnCl2 solution (a paramagnetic medium) was placed in this region, followed by the introduction of microplastic samples (as either a suspension or dry powder). The sample cell was then left undisturbed to allow microplastics to accumulate under the combined influence of magnetic, buoyant, and gravitational forces. Given that enrichment kinetics vary with particle size, a series of gravimetric experiments were conducted to determine the minimum equilibration time required for complete enrichment across different size ranges. These empirically derived time thresholds were subsequently adopted as standard protocols in all subsequent experiments.

For off-axial levitation, the working region was defined at *x* = 20 mm, *y* = 0 mm on the magnet’s surface. This configuration was specifically designed to enable density-based separation of microplastics. Notably, all off-axial levitation experiments were performed only after successful completion of central axis enrichment: the sample cell was first allowed to equilibrate at the central position (*x* = 0 mm, *y* = 0 mm) to form compact microplastic aggregates, and then carefully translated laterally to the designated off-axial location (*x* = 20 mm, *y* = 0 mm). In this off-center region, the aggregates experienced pronounced radial and axial magnetic field gradients simultaneously, driving rapid migration toward the inner wall of the sample cell and inducing clear vertical stratification along the z-direction based on particle density. This entire separation process was highly efficient, typically completing within less than 25 minutes.

**1.3 Simulation of magnetic field distribution**

To evaluate the static magnetic field distribution generated by the ring-shaped permanent magnet under realistic experimental conditions, a three-dimensional magnetostatic numerical simulation of the complete system—including both the magnet and the sample cell—was performed using COMSOL Multiphysics 6.0 (AC/DC Module). The permanent magnet is axially magnetized (with the top surface as the north pole) and has an inner diameter of 20 mm, outer diameter of 60 mm, and height of 20 mm, with a remanent flux density *Br* = 1.25 T. The magnetization vector is aligned with the global *z*-axis and defined as *M* = (0, 0, *Br*/*μ*0), where *μ*0 = 4π × 10-7 H/m is the permeability of free space.

A cubic sample cell of dimensions 20 mm × 20 mm × 50 mm was placed on the top surface of the magnet, either centered at the central axis (*x* = 0 mm, *y* = 0 mm, *z* = 20 mm) or offset to an off-axis position (*x* = 20 mm, *y* = 0 mm, *z* = 20 mm). The sample cell was filled with a 1.2 M aqueous solution of MnCl2, which exhibits paramagnetic behavior due to the presence of unpaired electrons in Mn2+ ions. Based on literature data, the volumetric magnetic susceptibility of the 1.2 M MnCl₂ solution is approximately *χv* ≈ 2.046 × 10-4; thus, its relative permeability was set to μr = 1 + *χv* = 1.0002046 and modeled as a linear, isotropic magnetic medium1.

The entire computational domain was enclosed within a spherical air region of 300 mm in diameter to effectively approximate free-space boundary conditions. A “Magnetic Insulation” boundary condition—corresponding to zero normal component of the magnetic flux density—was applied on the outer spherical boundary to mimic an infinite domain. The geometry was discretized using a free tetrahedral mesh, with local refinement near the edges of the permanent magnet and in and around the sample cell to accurately resolve regions of high magnetic field gradients. A stationary solver was employed to compute the solution based on the finite element method, solving the current-free Maxwell’s equations.

**1.4 Estimation of the recovery rate and enrichment time**

First, the initial mircoplastic sample was accurately weighed and introduced into the magnetic levitation system for enrichment. Upon completion of the enrichment process, the quartz tube was removed from the magnetic field region and positioned with the wall enriched with microplastics facing downward. The supernatant solution in the sample chamber was carefully aspirated using a micropipette. Deionized water was then added to the chamber to redissolve any residual MnCl2·4H2O crystals. The resulting aqueous suspension was subjected to centrifugation; the supernatant was discarded, and the precipitate was retained. The precipitate was subsequently dried and reweighed. Finally, the mass before and after enrichment was compared, and the corresponding data were recorded.

**1.5 Preparation of grating sidewall**

The preparation process of the polydimethylsiloxane (PDMS) sidewall with one-dimensional grating structure is as follows: The PDMS stock solution was first mixed with the binding agent in a 10:1 mass ratio, and then stirred at low temperature for 4 h to obtain a viscous colloid. The gel was then spin coated onto thegrating array template at a certain rate and left to stand for 1 h at 4 ℃. The purpose of this process is to dislodge any air bubbles that may have been mixed during the spin-coating process. The sample was dried in an oven at 90 ℃ for 4 h, and was gently peeled from the template. Finally, the substrate was modified with Ag NPs by using the high vacuum thermal evaporation system (VZZ-300S), the vacuum in experiment is 4.5 × 10-4 Pa and the deposition rate is 0.2 Å/s.

**1.6 In-situ Raman spectra collection and imaging**

For the acquisition of Raman spectra of microplastics, all the spectra were obtained from the Raman microscope system (HORIBA HR Evolution 800), with the laser wavelength, diffraction grating and integration time of 532 nm, 600 g/mm and 4 s, respectively. During the detection, all the Raman spectra were collected under the laser power of 4.8 mW. For microplastics imaging, integration time of 1s was used in order to reduce signal acquisition time when scanning a large area (25 × 25 μm2).

2. Supplementary note

**Note 1 Mechanism and advantage of off-axial MagLev module using single ring-shaped magnet**

In this work, a single ring-shaped magnet is selected as the magnetic field source for the MagLev system. The operational region of the system is located in the upper surface area between the inner radius (*R*in) and outer radius (*R*out) of the magnet. Compared to conventional magnetic levitation systems formed by dual-ring magnets with opposite poles2, 3, the single ring-shaped magnet structure is more compact. For instance, the levitation module in this study has dimensions of approximately 60 mm × 60 mm × 80 mm (**Figure S1**), offering significant advantages in terms of integration. It is compatible with various models of commercial Raman spectrometers (**Figure S1**). Moreover, in the single-ring system, when the working region is selected between the inner and outer radius of the magnet, the target object typically remains in close contact with the container wall during force equilibrium. This characteristic greatly facilitates operations such as optical microscopy imaging and laser focusing with the spectrometer, enhancing the convenience of detection and signal acquisition efficiency.

The suspension behavior of the target object within the working region is governed by the magnetic force (***F***m), buoyant force (***F***b), supporting force (***F***s, provided by the container wall), and gravitational force (***F***g). When the target object is suspended in a stationary position, the force equilibrium equation is given by:

(2.1.1)

According to existing theory3, the above equation can be expressed as:

(2.1.2)

Where *χ*s and *χ*m represent the volume magnetic susceptibilities of the target object and the paramagnetic medium, respectively, *ρ*s and *ρ*m are their densities, *V* is the volume of the target object, *μ*0 is the magnetic permeability of free space, and ***B*** is the local magnetic induction. In this study, we use MnCl2 aqueous solution as the paramagnetic medium, with a magnetic susceptibility *χ*m approximately equal to 1.81 × 10-3, which is significantly greater than the *χ*s of common microplastics (approximately -7× 10-6 to -1× 10-5). Therefore, in the above equation,

(2.1.3)

Considering the axial symmetry of the magnetic field generated by the ring magnet, we can expand the above equation solely in the *x*-*z* direction, where the *x* direction is defined as:

(2.1.4)

and the *y* direction is defined as:

(2.1.5)

Based on experimental observations, the microplastics in a suspended state are in close contact with the container's sidewall. Therefore, the force ***F***s in equation (2.1.4) is provided by the wall of the container, and its magnitude changes with the position of suspension, ensuring that equation (2.1.4) remains zero at all times.

In the experiment, we selected the position at *x* = 20 mm for investigation, at which point:

, (2.1.6)

Therefore, equation (2.1.5) can be simplified to:

(2.1.7)

That is, once the paramagnetic medium is determined, the suspension behavior of the target object within the system depends solely on *Bz*×(∂*Bz*/∂*z*) and its own density *ρ*s. This characteristic indicates that the system is capable of achieving target object separation based on density differences.

**Note 2 Separation degree for multiple microparticles**

Compared to the scenario where only two types of microparticles, PLA and PET, are present in the MnCl2 solution, the definition of the separation degree becomes more complex when the solution contains four types of microparticles—PS, PMMA, PLA, and PET. Firstly, we aim for a large separation range (range of extreme values, *R*) for the overall four types of particles, while also ensuring their distribution is as uniform as possible (number of covered bins, *C*; interval uniformity, *U*), avoiding situations where two types of particles are either too closely adjacent or too sparsely separated (interval variance, *V*; distribution entropy, *E*). Therefore, in evaluating the separation degree between multiple particles, we comprehensively consider five parameters: the range of extreme values (*R*), variance (*V*), number of covered bins (*C*), distribution entropy (*E*), and interval uniformity (*U*). Based on this, we define the scoring function as:

(2.2.1)

The higher the score, the better the separation degree between different microparticles. **Figures S5a and S5b** respectively illustrate the separation degree *vs* different MnCl2 concentrations during the *axial separation* and *off-axial separation*, and **Figure S5c** shows the score values obtained through the equation (2.2.1).

**Note 3 Adsorption capacity test of PS microsphere**

First, PS microsphere dispersion with PS diameter of 1  μm, 2  μm, and 5  μm (5  μL each, 2.5  mg/mL) were separately added in three 5  mL of R6G solution (10-6 M) for 30 minutes. Then, after centrifuging and removing the samples, the absorbance spectrum of the residual solution was measured. According to the Lambert-Beer equation *A* = *k* × *l* × *c*, where *A*, *k*, *l*, and *c* are the absorbance, molar absorption coefficient, absorption layer thickness, and solution concentration, respectively, the concentration of the residual solution can be estimated using *cresidual* = (*Aresidual* / *Aoriginal*) × *coriginal*. Assuming no volume change for the residual solution, the number of molecules adsorbed by different substrates can be calculated using *Madsorbed* = *V* × (*coriginal* − *cresidual*), where *V* is the solution volume (≈ 5  mL).

**Note 4 Raman intensity of the probe vs the number**

**Figure S26b** illustrates the Raman spectra of R6G collected from the surfaces of PS microspheres (diameter: 2 μm) after being immersed in R6G solutions of varying concentrations (*c*R6G: from 10-2 M to 10-4 M). It is evident that the intensity of the characteristic peak of R6G at *I*613 exhibits a strong proportional relationship with the concentration *c*R6G, with a regression coefficient about 0.97. Since the volume of the R6G solution remains constant in the experiment, in other words, within the concentration range of 10-2 M to 10-4 M, *I*613 is proportional to the number of molecules on the surface of the PS microspheres. That is,

(2.4.1)

Based on the results presented in **Figure 5b and S26a**, it can be inferred that the number of molecules adsorbed on the surface of the PS microspheres is several orders of magnitude greater than 105. Therefore, *k* can be considered as the average Raman intensity at the characteristic peak of R6G at 613 cm-1 for a single R6G molecule, in a statistical sense.

**Note 5 Equivalent size estimation**

(1) Principle: Consider an existing microplastic dispersion X with a volume *V*, containing microplastic particles of various sizes and shapes, with a total particle number *N* and a total mass *M*. Assume there is another microplastic dispersion X’ with the same volume, composed of identical spherical particles with a radius *R*equivalent, and with the same total particle number *N* and total mass *M*. An equal amount of organic molecules, such as R6G, is then introduced into both the dispersions. If the number of R6G molecules ultimately adsorbed on the surfaces of microplastics in X is identical to that adsorbed on the surfaces of microplastics in X’, then, from the perspective of adsorption capacity, X and X’ can be regarded as equivalent. Under this condition, *R*equivalent can be defined as the equivalent radius of X. For system X’, the total surface area *S*X’ can be expressed as:

(2.5.1)

According to the above expression, if *S*X’ and *N* can be determined experimentally, *R*equivalen can be calculated.

(2) How to obtain the *S*x’: For the R6G molecules adsorbed on the surface of microplastics, within a certain concentration range, the total Raman intensity *I*R6G can be expressed as (Supplementary Note 4):

(2.5.2)

Here, *I*R6G-0 denotes the statistically averaged Raman intensity of a single R6G molecule, and *N*R6G represents the total number of R6G molecules adsorbed on the surfaces of all microplastics. Assuming that the number of R6G molecules adsorbed per unit area on the microplastic particles is *κ*, it can be observed from the adsorption test of PS microplastics in **Figure 5b and S26a** that, for microplastics of the same material, *κ* is independent of the microplastic size. According to previous studies4, *κ* can be expressed as a function of the probe concentration, *i.e.*, *κ* *=* *κ*(*c*R6G), where *c*R6G is the concentration of R6G in the solution. For microplastic X, the above equation (2.5.2) can be written as:

(2.5.3)

*S*x represents the total surface area of microplastics in system X. For the equivalent system X’, since the total number of R6G molecules adsorbed is the same as that in system X, it follows that:

(2.5.4)

*i.e.*

(2.5.5)

Defining a function *D*(*c*R6G) as:

(2.5.6)

the equation (2.5.3) can be written as:

(2.5.7)

where the *D*(*c*R6G) can be interpreted as the Raman intensity of R6G that can be contributed by the microplastic X per unit area. Thus, *S*X’ can be expressed as:

(2.5.8)

For the function *D*(*c*R6G), it can be obtained using the following approach. In the experiment, a microplastic dispersion with a known total surface area (denoted as *S*0) is selected. By varying the concentration of R6G added to the dispersion and measuring the Raman intensity of R6G adsorbed on the microplastic surface, a dataset [*I*R6G/*S*0, *c*R6G] can be obtained. According to Equation (2.5.7), *D*(*c*R6G) corresponds to the fitting function of this dataset [*I*R6G/*S*0, *c*R6G]. **Figure 5c** shows that, for PS, *D*(*c*R6G) can be obtained *via* linear fitting, with a regression coefficient of approximately 0.97. Therefore, once the *D*(*c*R6G) function of X is determined, the surface area *S*x of an unknown sample X can be calculated from the experimentally measured Raman intensity *I*R6G of surface-adsorbed R6G molecules, and *S*X’ can subsequently be determined.

(3) How to obtain the *N*: The results in **Figure S26c** show that, within a certain concentration range, the total Raman spectral intensity *I*plastic of microplastics of different sizes in the solution can be fitted to a proportional relationship with the microplastic concentration *c*plastic, with an average regression coefficient greater than approximately 0.9, that is,

(2.5.9)

For X’, it follows that:

(2.5.10)

For an equivalent system X’, its *I*X’ should remain identical to *I*X; therefore,

(2.5.11)

For the function *F*(*R*), it can be obtained through the following procedure. Microplastic spherical particles of identical size are selected as standards. For example, microplastics with a radius of *R*1 are chosen, and the corresponding Raman spectral intensity *I*(*c*x-*R*1) is measured at different microplastic concentrations *c*x-*R*1. This yields the data set [*I*(*c*x-*R*1), *R*1], from which *F*(*R*1) can be derived by fitting. The results shown in **Figure 5d** indicates that, within a certain concentration range, *F*(*R*1) can be treated as a constant, namely the slope of the fitted line in **Figure S26c**. Subsequently, the radius of the spherical microplastic particles is varied and the above procedure is repeated to obtain *F*(*R*2), *F*(*R*3),…, *F*(*R*n), forming the data set [*F*(*R*), *R*]. Fitting this data set yields the functional form of *F*(*R*) (**Figure 5d**).

(4) How to obtain the *R*equivalent: For X’, by further solving the system of equations (2.5.1), (2.5.8), and (2.5.11), we obtain:

(2.5.12)

In equation (2.5.12), the functions *F*, *D*, and the solution volume *V* are all known. Therefore, if the Raman spectral intensity *I*X of the microplastic X and the Raman spectral intensity *I*R6G of the surface-adsorbed R6G are measured experimentally, *R*equivalent can be determined.

**Note 6 Workflow for using the MagLev-Raman module**

First, 5 mL of the microplastic dispersion to be tested was added into a sample chamber, followed by adding a certain amount of MnCl2 solution (final concentration of 0.5 M) and pre-enriched for 20 minutes. Subsequently, the microplastic particles were enriched and precisely positioned on the sidewall with grating structure *via* the *off-axial slant separation*. Then, the IS-Raman signal was collected for component identification and concentration quantification. After that, the chamber was slowly rotated to a horizontal position for IS-Raman imaging to obtain the morphological information of the microplastics. Following the above characterization, the enriched microplastic particles were re-dispersed in the solution, and 50  μL of R6G solution (10-3 M) was added. The mixture was allowed to stand for 30 minutes to ensure sufficient adsorption of R6G onto the surfaces of the microplastic particles. To eliminate the interference from free R6G in the solution for subsequent detection, the system was subjected to a cleaning procedure: the solution was first centrifuged, then the supernatant was removed, and at last 5 mL of fresh MnCl2 solution (0.5 M) was added to re-disperse the microplastic particles. The chamber was then placed back under the MagLev-Raman module to enrich and position the microplastic particles on a flat sidewall (the other side of the chamber). Then, the Raman intensity of the adsorbed R6G was detected. At last, we substituted it with the Raman intensity of the microplastic into the aforementioned formula to estimate the equivalent size.

**Note 7 Detection in the real seawater**

To evaluate the detection performance of the MagLev-Raman module in real aquatic environments, four seawater samples were collected along the coastline of China, including the Bohai Sea, the Yellow Sea, the East China Sea, and the South China Sea (the locations are marked in **Figure 6a**).

Prior to test with standard PS microspheres of defined size, potential interference from indigenous microplastics in the raw seawater needed to be evaluated. The following procedure was therefore implemented: First, the four seawater samples were subjected to ultrasonication to homogenize the sediment deposited at the bottom. Subsequently, 5 mL of each sample was transferred into a sample chamber. Then, a 0.5 M MnCl2 seawater solution was prepared. Finally, the chamber was placed in the MagLev-Raman module to undergo an *off-axial slant separation* and IS-Raman analysis. As shown in the **Figure S29**, no aggregation of microplastics was observed in any of the four samples. The corresponding IS-Raman sepctra also showed no more useful information there (**Figure 6c**).This may be attributed to the fact that the collected seawater originated from the surface layer of shallow coastal regions, where the concentration of background microplastics is extremely low or consists primarily of nanoplastics beyond the effective manipulation range of the MagLev force. Therefore, the addition of standard PS microspheres to these water samples does not significantly interfere with the subsequent experimental results.

Then, the mixed PS microspheres (with size of 1 μm, 2 μm, and 5 μm in diameter respectively, total concentration 5 μg/L) were added into the seawater samples, and the samples were followed by comprehensive analysis by the MagLev-Raman module again. The results are shown in **Figures 6b, and 6d to 6f**

3. Figures and tables


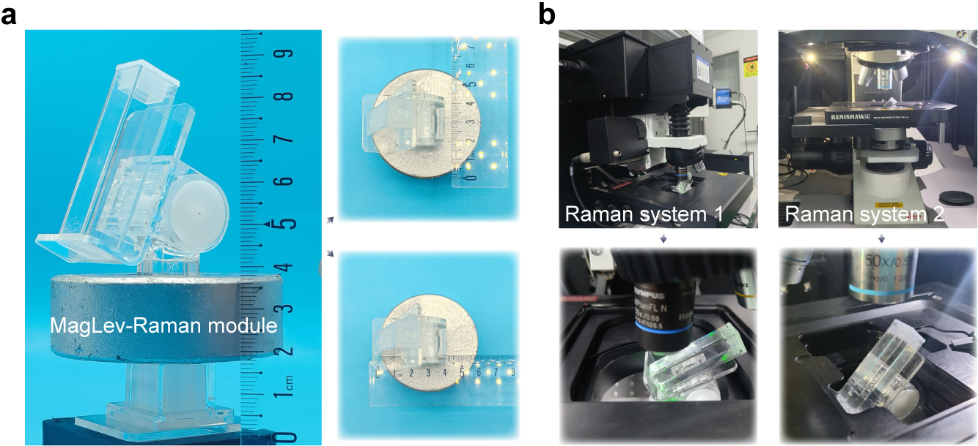


Figure S1**.** **a** Photographs of the MagLev-Raman module with size *ca.* 60 mm × 60 mm × 80 mm. **b** MagLev-Raman module under working state using different Raman testing systems.


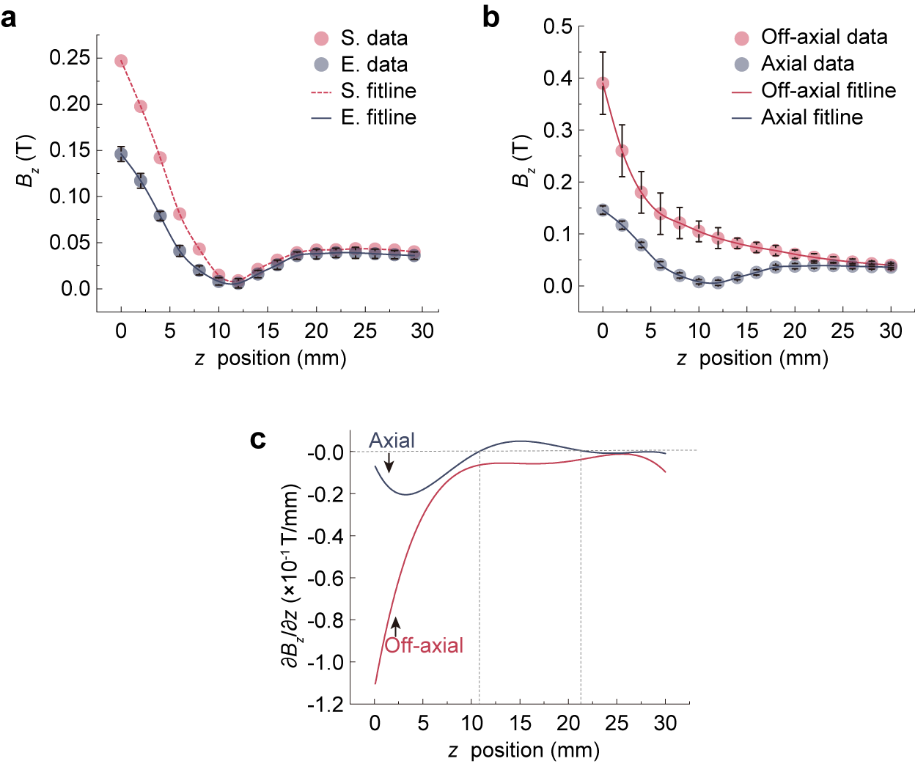


Figure S2**.** **a** *Bz*(*x* = 0 mm, *y* = 0 mm, *z*) values obtained from experiments and numerical simulations. **b** Comparison of *Bz*(*x* = 0 mm, *y* = 0 mm, *z*) and *Bz*(*x* = 20 mm, *y* = 0 mm, *z*) values obtained from experiments. **c** ∂*Bz*/∂*z* values inside (*x* = 0 mm, *y* = 0 mm) and outside (*x* = 20 mm, *y* = 0 mm) axial obtained from experimental fitlines.


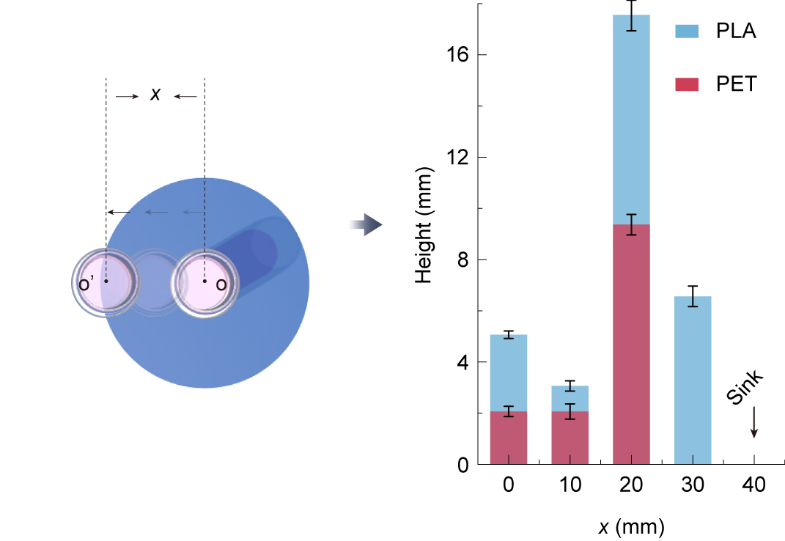


Figure S3**.** MagLev height of PLA and PET microplastics *vs* different *x* positions (*y* = 0 mm).


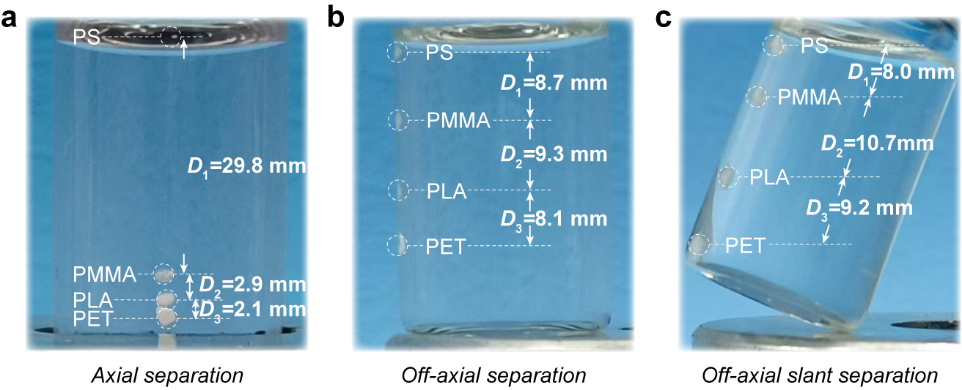


Figure S4. Comparison of *axial*, *off-axial* and *off-axial slant separation* for PS, PMMA, PLA and PET microplastics: optical images show that *off-axial slant separation* makes the best separation.


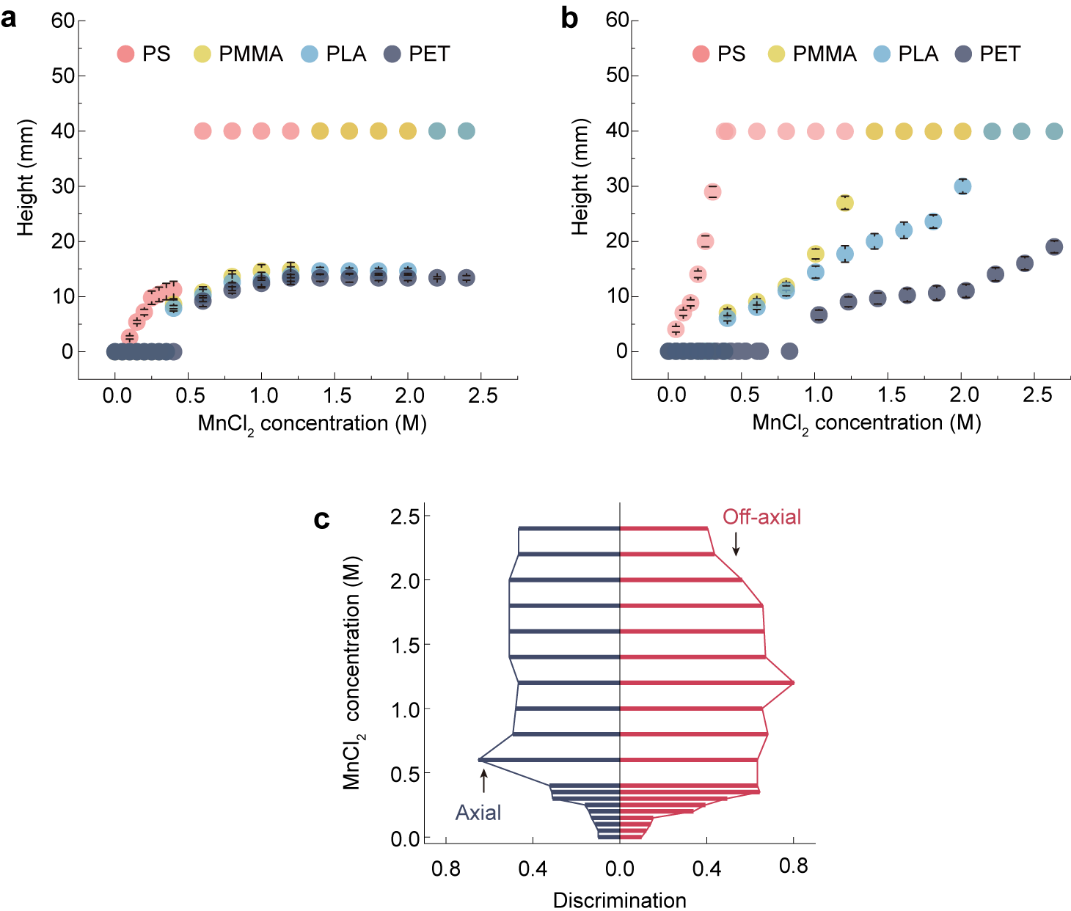


Figure S5. MagLev height of PS, PMMA, PLA and PET microplastics *vs* different MnCl2 concentrations: **a** *axial* *separation*; **b** *off-axial separation*. **c** Discrimination *vs* different MnCl2 concentrations.


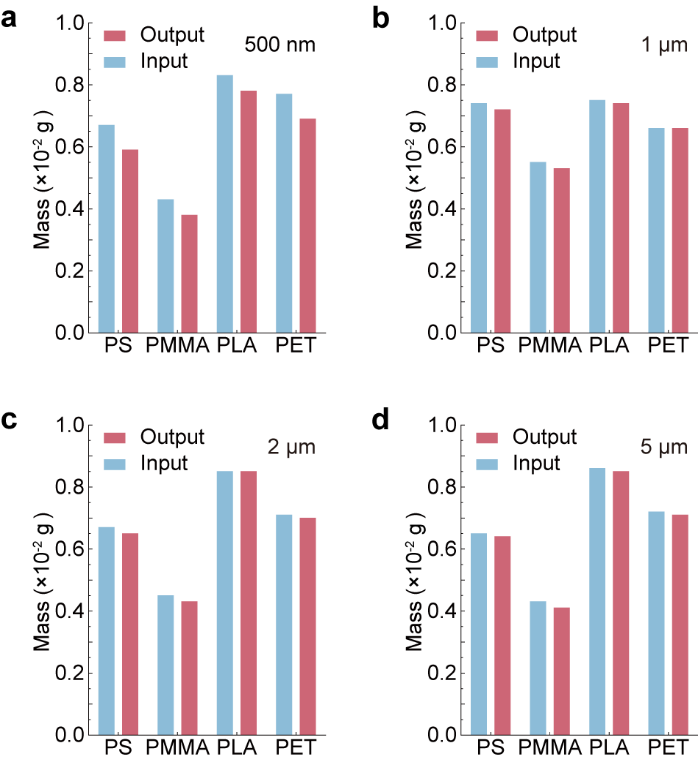


Figure S6. **a-d** Comparison of the input mass and output mass of PS, PMMA, PLA and PET microplastics with different sizes through the MagLev system.


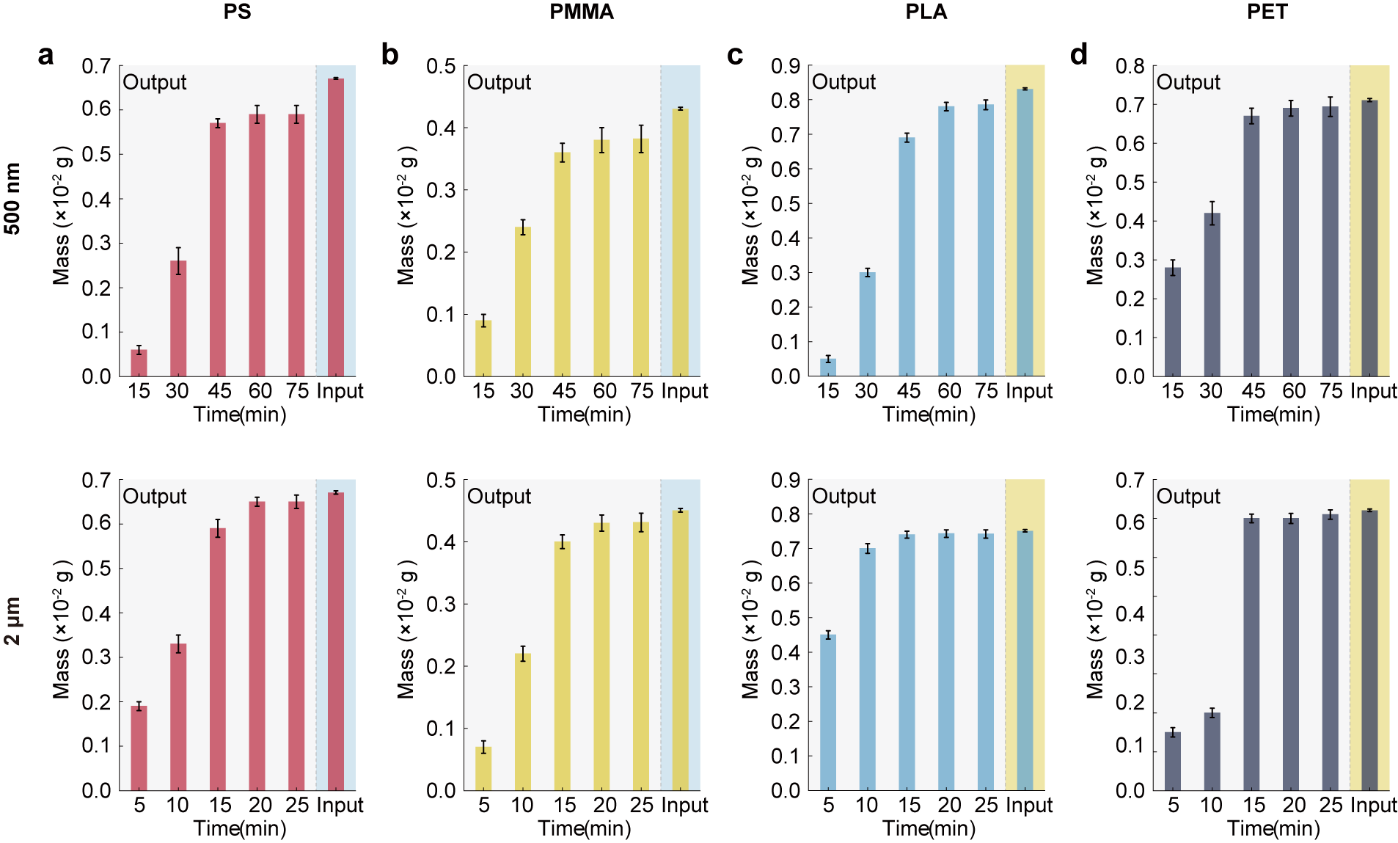


Figure S7**.** **a-d** Comparison of the input mass and output mass of PS, PMMA, PLA and PET microplastics with size of 2 μm and 500 nm through the MagLev system at different time.


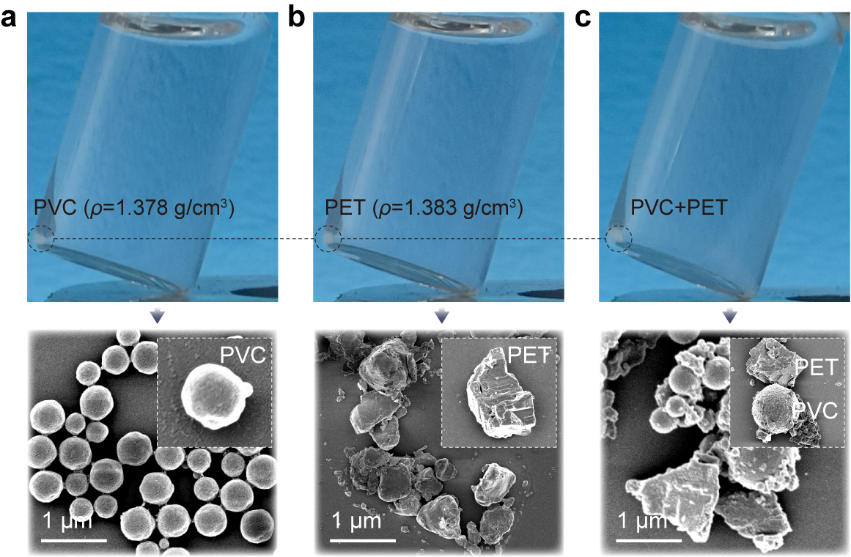


Figure S8**.** **a-c** MagLev behavior of PVC, PET microplastics and their mixtures with different sizes, along with theSEM images of the corresponding samples collected from the MagLev region


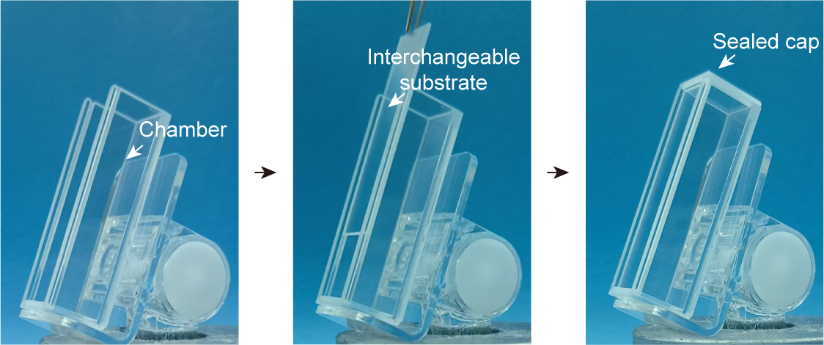


Figure S9. The self-designed sample chamber with interchangeable sidewall.


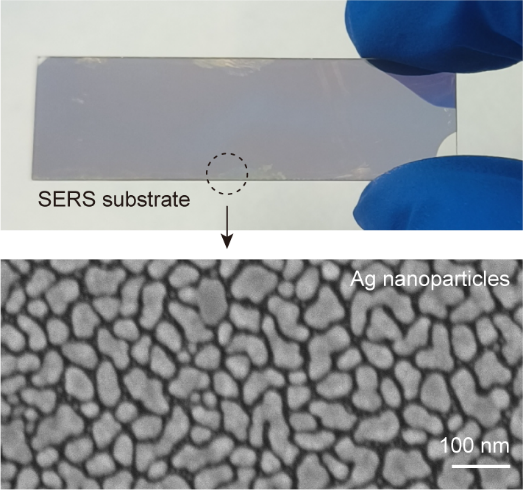


Figure S10. A simple SERS substrate (highly-transparent 1.5 cm × 5 cm quartz glass coated with 10 nm thick Ag nanoparticles) was used as the chamber sidewall: the optical (up) and SEM (down) images.


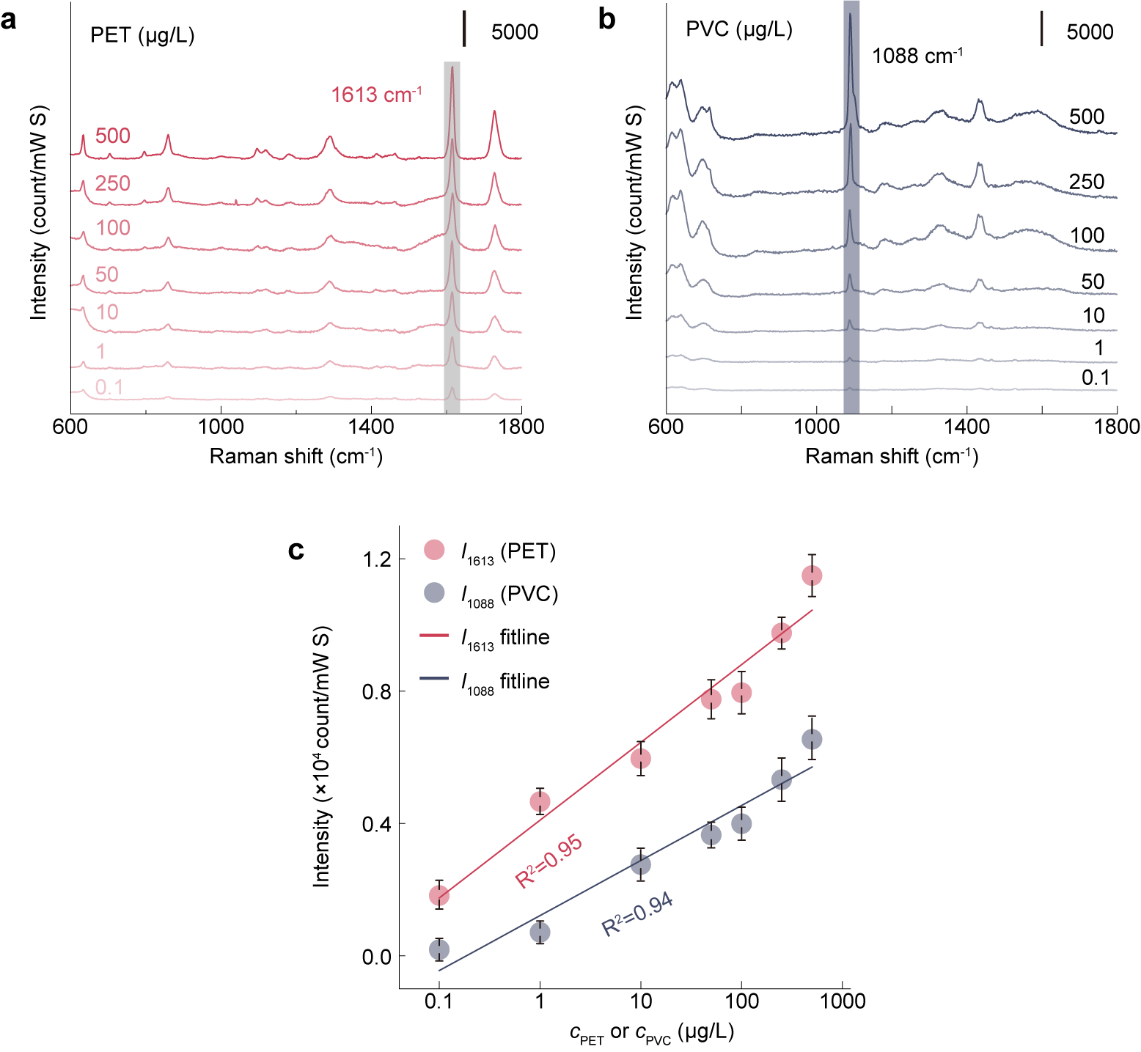


Figure S11. **a, b** IS-Raman spectra of PET and PVC microplastics with different concentrations collected from MagLev-Raman module. **c** Characteristic peak intensity *I*1613 of PET and *I*1088 of PVC *vs* *c*.


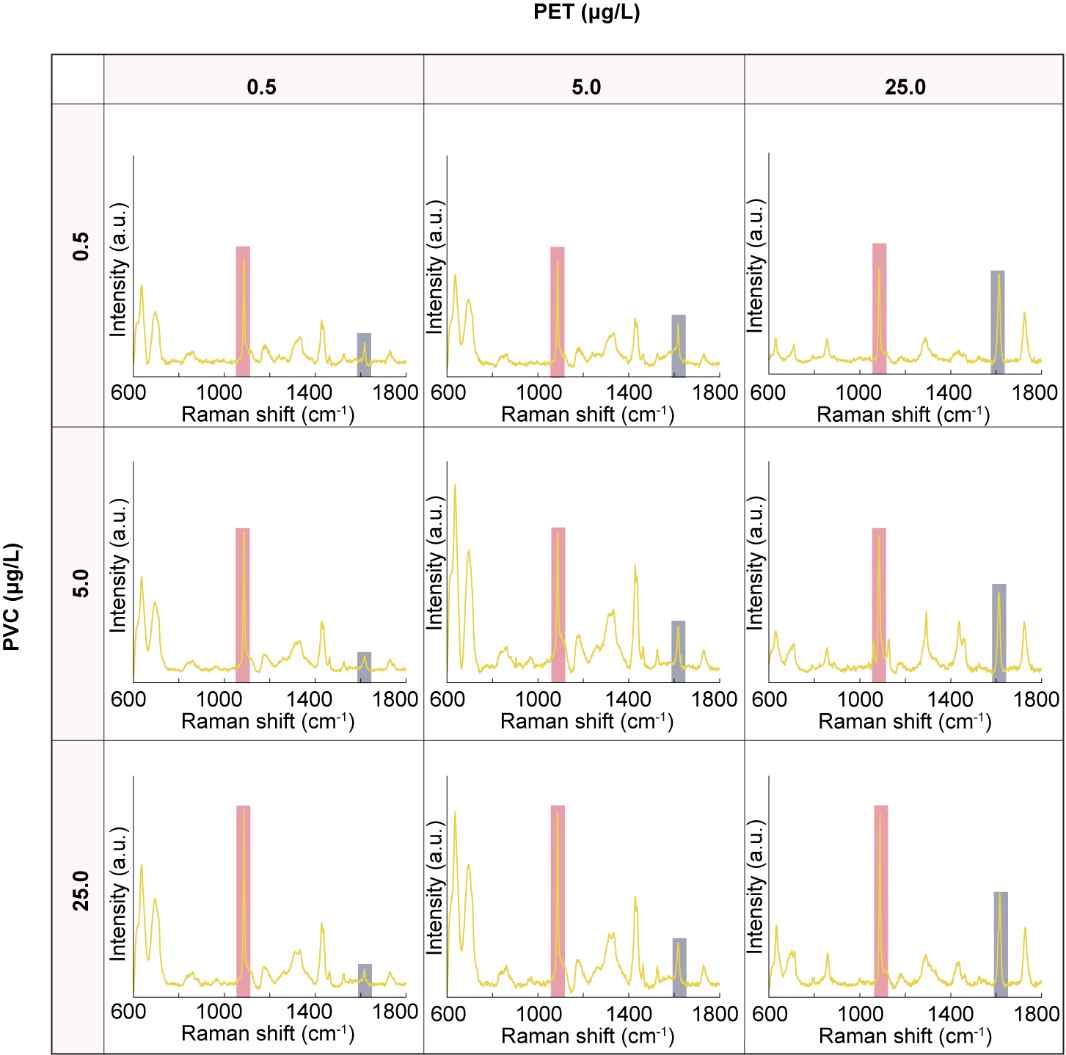


Figure S12. IS-Raman spectra of PET and PVC mixture with different concentrations.


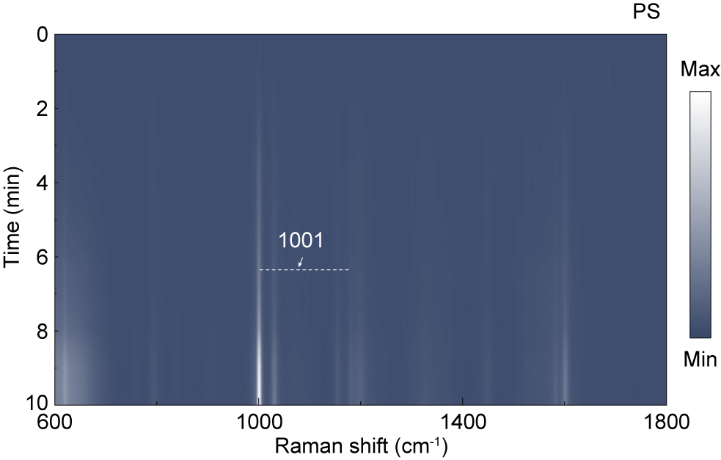


Figure S13. Temporal IS-Raman spectra of PS collected from MagLev-Raman module.


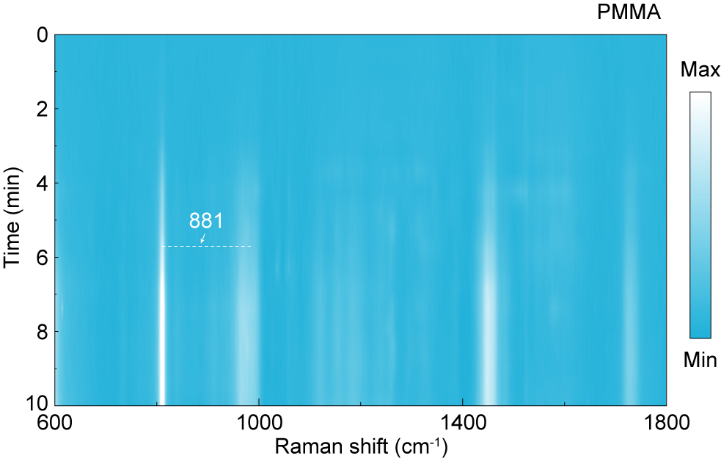


Figure S14. Temporal IS-Raman spectra of PMMA collected from MagLev-Raman module.


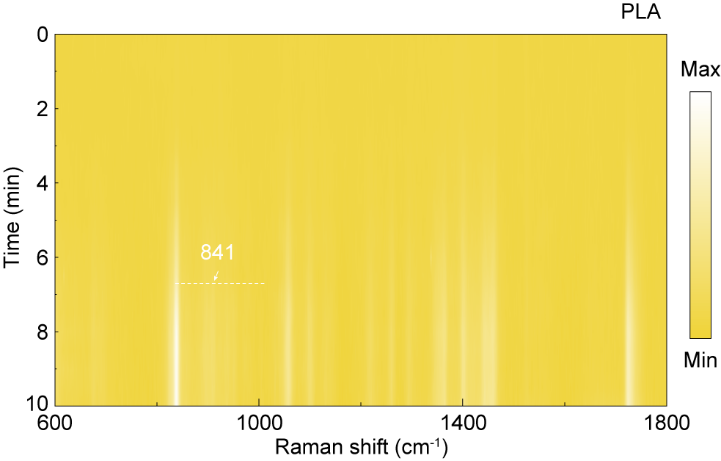


Figure S15. Temporal IS-Raman spectra of PLA collected from MagLev-Raman module.


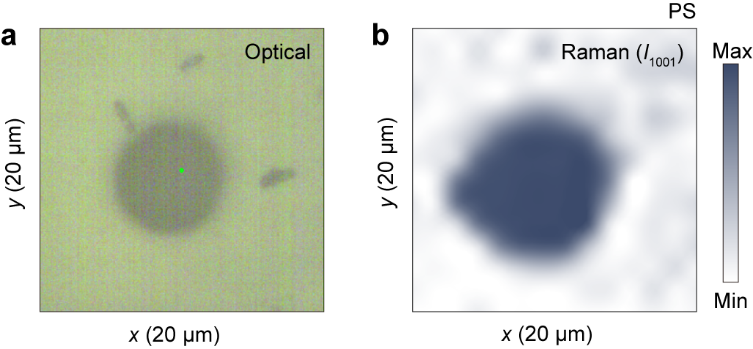


Figure S16. **a, b** *In-situ* optical and Raman images of PS collected from MagLev-Raman module, respectively.


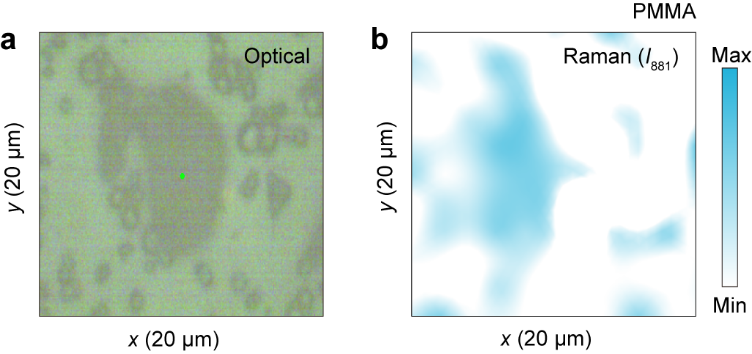


Figure S17. **a, b** *In-situ* optical and Raman images of PMMA collected from MagLev-Raman module, respectively.


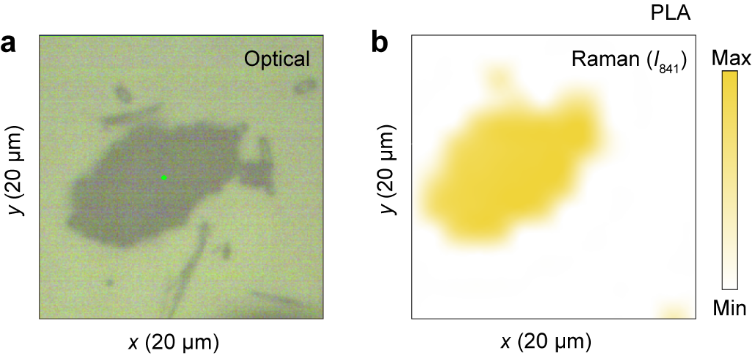


Figure S18. **a, b** *In-situ* optical and Raman images of PLA collected from MagLev-Raman module, respectively.


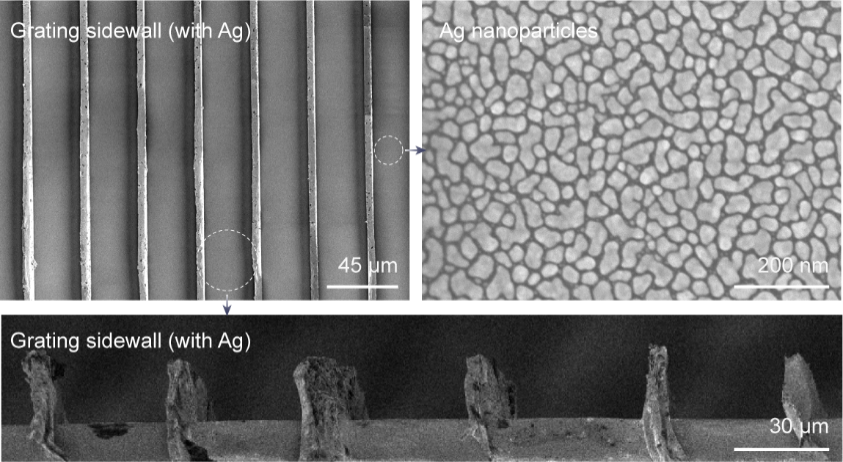


Figure S19. SEM images of the grating sidewall, and the single grating width, period and depth are respectively *ca.* 5 μm, 30 μm, and 15 μm.


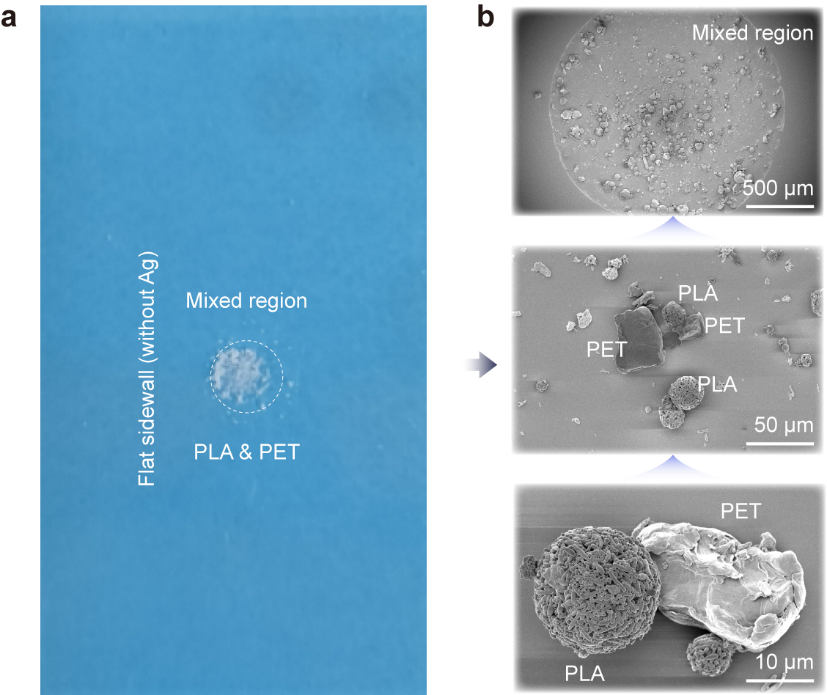


Figure S20. **a** Flat sidewall with PLA and PET microparticles on surface, where the PLA and PET microparticles are mixed together in same region. **b** SEM images of the mixed region at different magnifications.


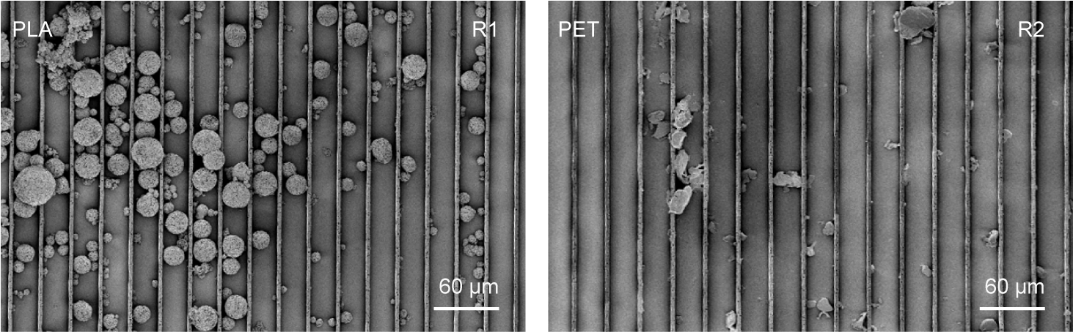


Figure S21. SEM images of the grating sidewall with PLA and PET microplastics on surface.


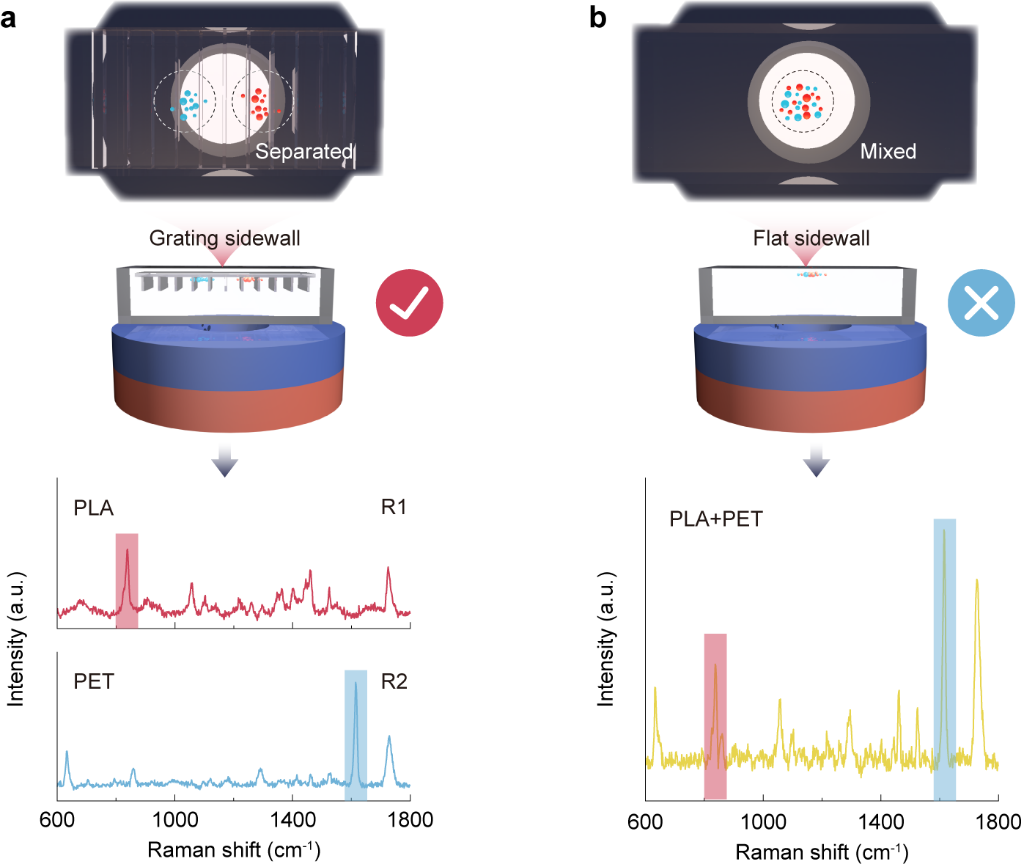


Figure S22. **a, b** IS-Raman spectra obtained from (a) the separated regions at grating sidewall and (b) the mixed region at flat sidewall, respectively.


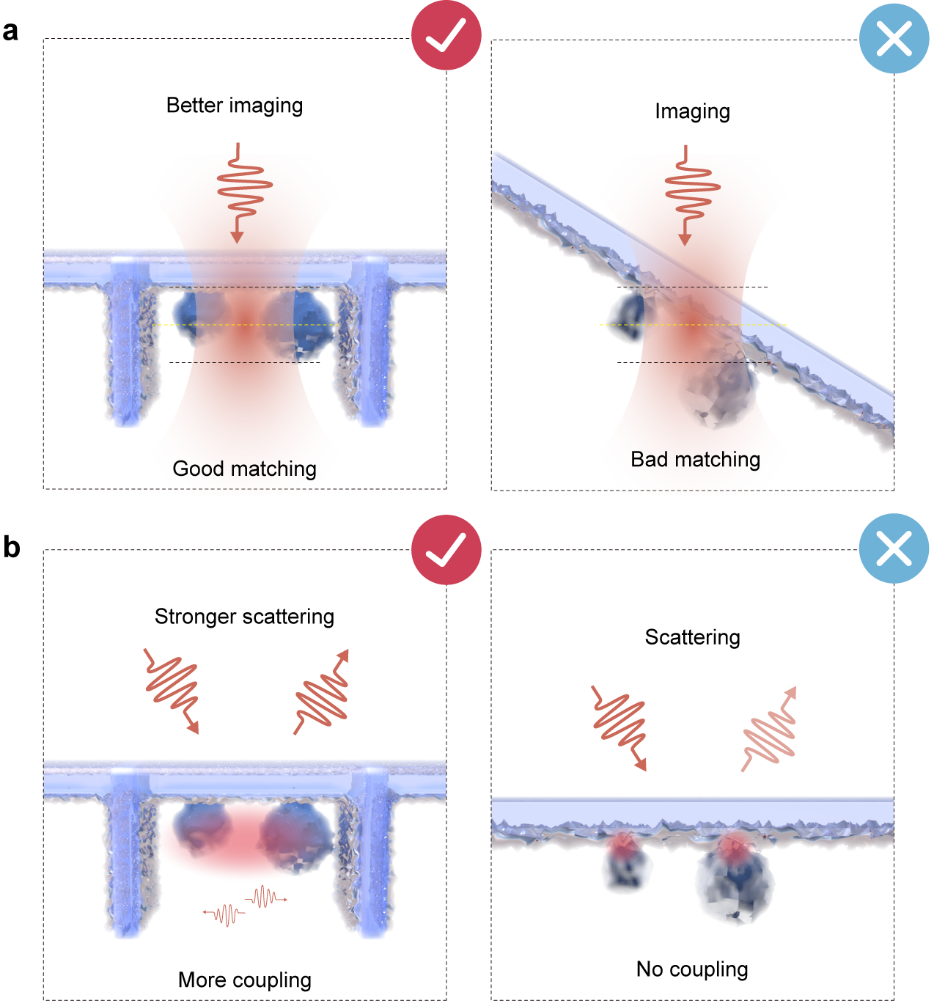


Figure S23. **a, b** Horizontal grating sidewall can obtain (a) better Raman imaging and (b) stronger Raman intensity.


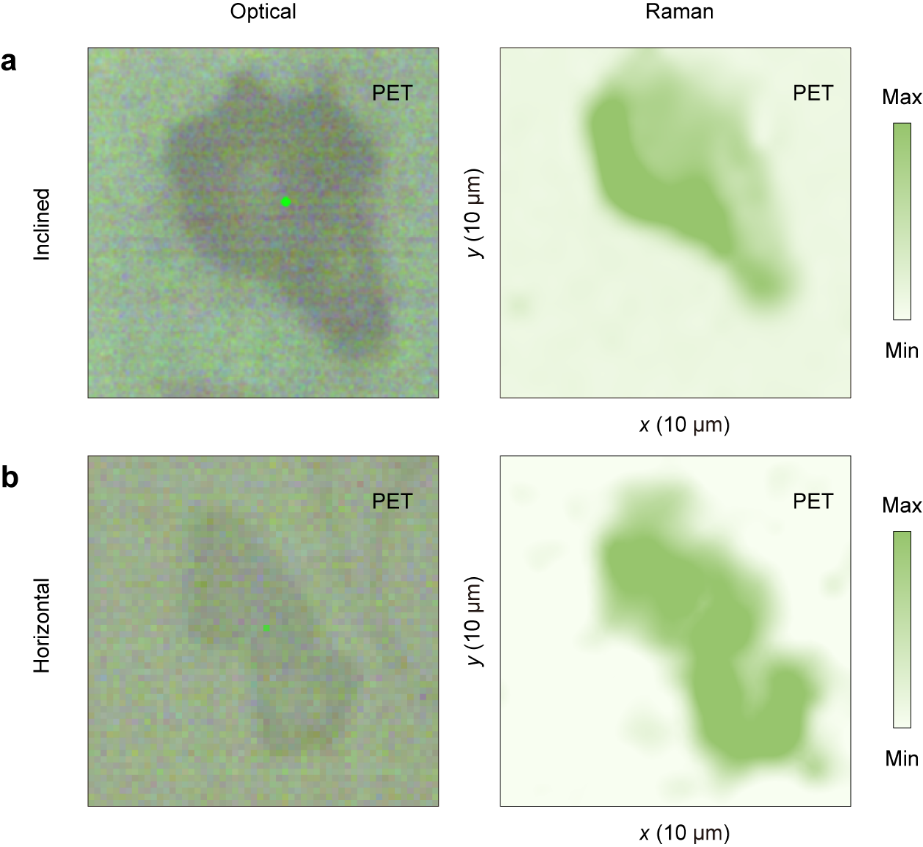


Figure S24. **a, b** *In-situ* optical and Raman images of PET microplastic particle acquired from horizontal and inclined states respectively.


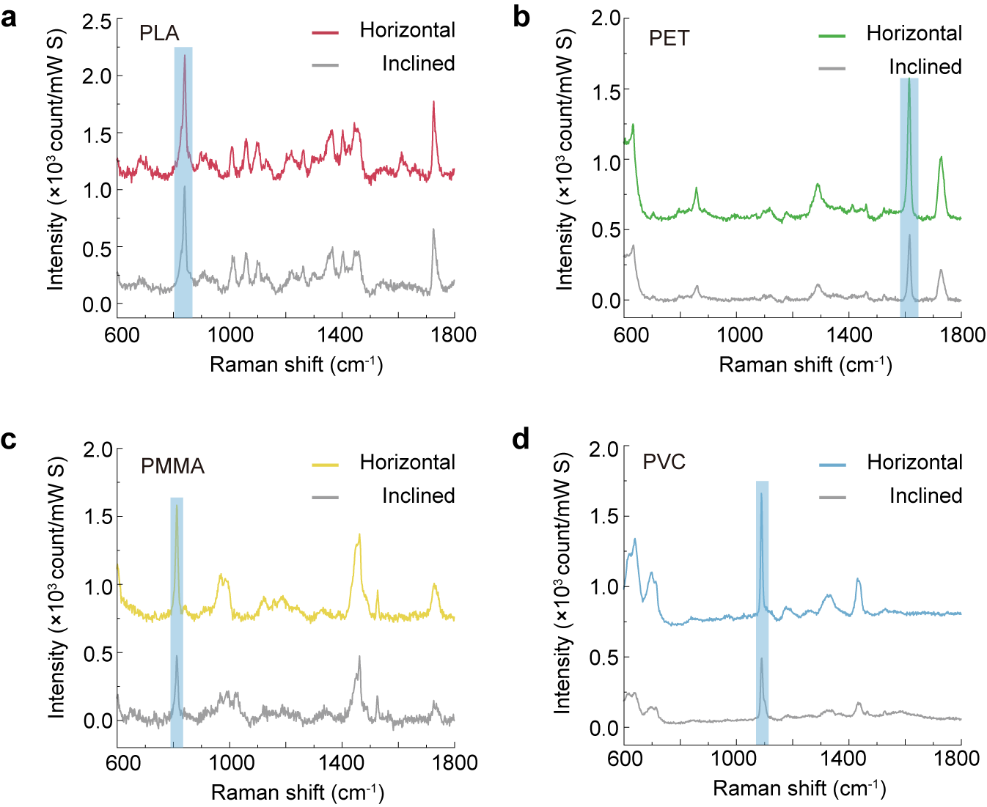


Figure S25. **a-d** IS-Raman spectra of PLA, PET, PMMA and PVC microplastics acquired from horizontal and inclined states respectively.


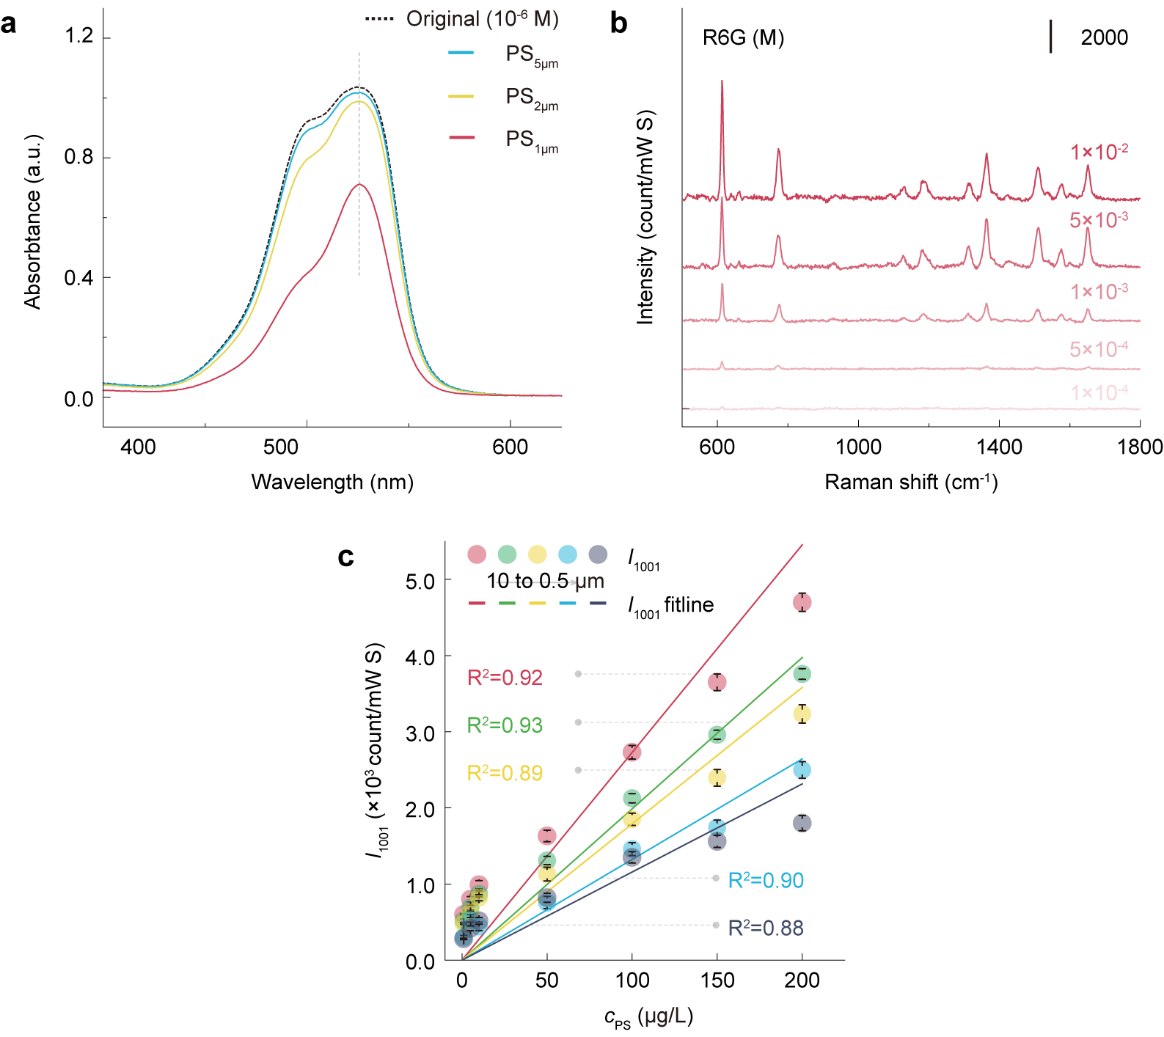


Figure S26. **a** Absorbance of the residual R6G solutions those after being adsorbed by PS microsphere samples with different diameters. **b** Raman spectra of R6G on PSs’ surfaces (diameters of 2 μm), with different *c*R6G. **c** *I*1001 of PS (diameters of 0.5 μm, 1 μm, 2 μm, 5 μm and 10 μm) *vs* *c*PS.


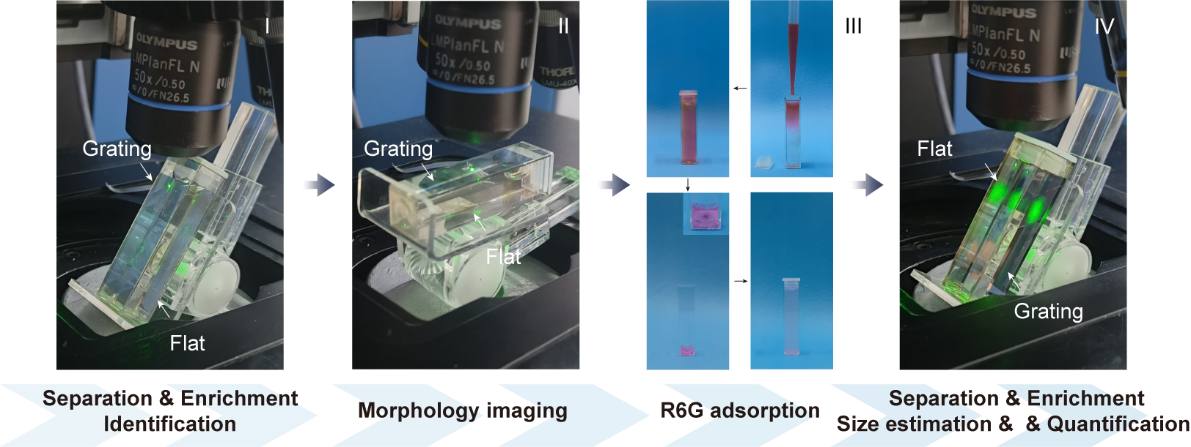


Figure S27. Workflow for acquiring comprehensive information of microplastic using the MagLev-Raman module (Supplementary Note 6).


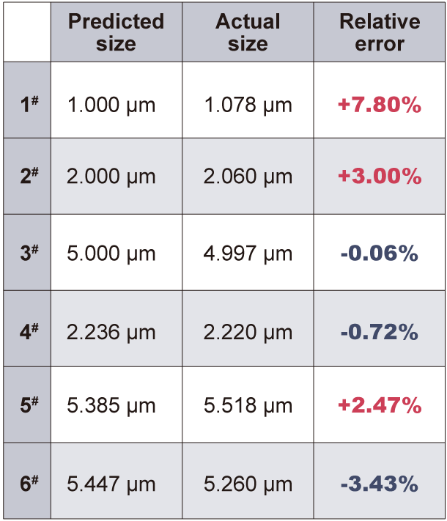


Figure S28. Comparison of the predicted equivalent diameters and the actual ones.


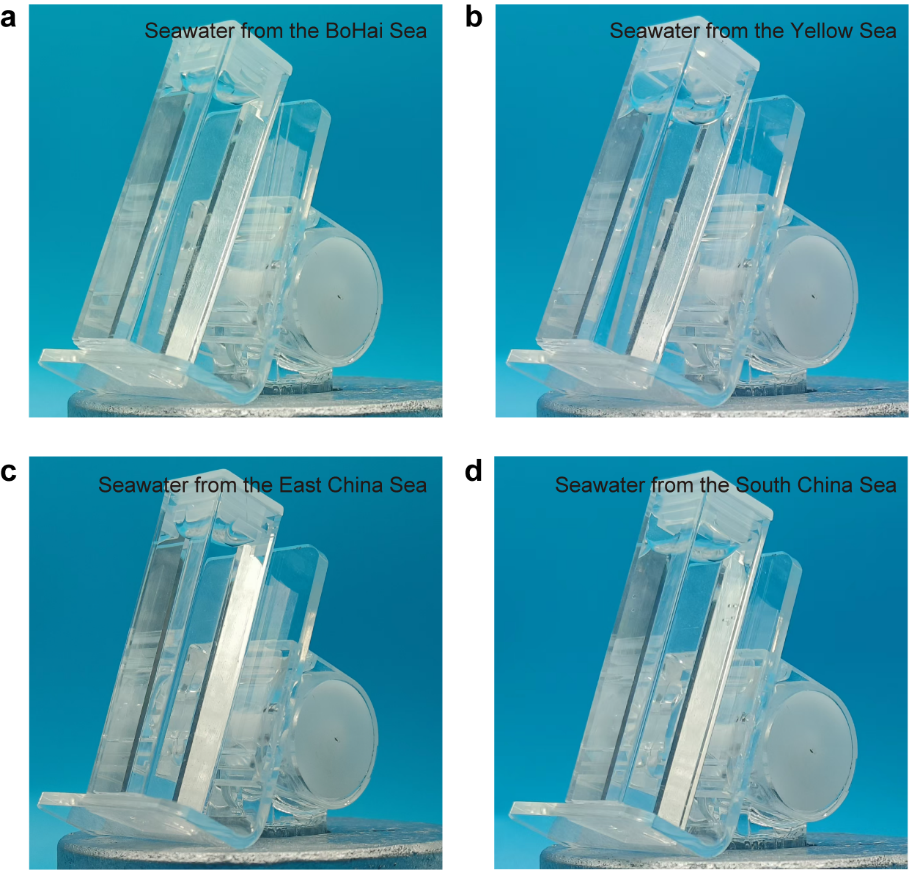


Figure S29. **a-d** Different seawater samples after undergoing *off-axial slant separation* *via* MagLev.

Table S1. Comparative overview of the MagLev-Raman module and other existing method for microplastic analysis. The symbols of ✓, △ and ✗ respectively represent that fully meets, partially meets and does not meet the descriptions.

| **Method** | **Analyte separation** | **Analyte enrichment** | **Component identification** | **Analyte**  **quantification** | **Morphological imaging** | **Size estimation** | **Notes** |
| --- | --- | --- | --- | --- | --- | --- | --- |
| **This work (MagLev-Raman module integrated with MagLev and IS-Raman)** | **✓** | **✓** | **✓** | **✓** | **✓** | **✓** | **Capable of synchronously and integrally performing all six functions in a single aqueous environment without sample transfer.** |
| Density gradient centrifugation & filtration5 | ✓ | ✓ | ✗ | ✗ | ✗ | ✗ | Merely a physical pretreatment.  Provides no chemical or structural information. |
| Micro-Raman (μ-Raman) spectroscopy6 | ✗ | ✗ | ✓ | ✓  (semi-quantitative) | ✓ | △  (image-based estimation; less data) | Capable of identification but requires pre-enriched samples.  cannot actively separate or enrich analytes. |
| Micro-FTIR (μ-FTIR) spectroscopy6 | ✗ | ✗ | ✓ | ✓  (semi-quantitative) | ✓ | ✗ | Imaging limited to particles >10–20μm.  Insufficient resolution for morphological or size analysis of smaller microplastics. |
| Scanning electron microscopy (SEM)7 | ✗ | ✗ | ✗ | ✗ | ✓ | ✓  (manual or software-assisted per particle) | High-resolution physical morphology and size data but requires drying and metal coating.  Lacks component information. |
| Dynamic light scattering (DLS) & nanoparticle tracking analysis (NTA)8, 9 | ✗ | ✗ | ✗ | ✓ | ✗ | ✓ | Rapid acquisition of size distribution and concentration, but cannot distinguish material component or provide chemical fingerprints. |
| Pyrolysis–gas chromatography/mass spectrometry (Py-GC/MS)10 | ✗ | ✗ | ✓ | ✓ | ✗ | ✗ | Destructive technique.  Loses single-particle information and provides no morphological or dimensional data. |
| Multi-step integrated workflow (filtration → SEM → Raman)11 | ✓ | ✓ | ✓ | ✓  (indirect) | ✓ | ✓  (indirect) | Covers all six functions, but suffers from procedural fragmentation, long processing time; uncertain recovery, and lack of *in-situ* integration. |
| Conventional magnetic levitation with lagnetic enrichment12 | ✓ | ✓ | △  (highly indirect inference) | △  (inferred indirectly from levitation behavior) | ✗ | ✗ | Relies on relative levitation height differences to indirectly infer composition and concentration. |
| Optical tweezers13 | ✗ | ✓ | ✗ | ✗ | ✗ | ✗ | Highly efficient for full-size-range analyte enrichment, but extremely low throughput and incapable of compositional sorting. |
| Conventional SERS14 | ✗ | ✗ | ✓ | ✓ | ✓ | ✗ | Only enhances signal intensity; requires external enrichment and offers no separation or less imaging capability. |
| Microfluidic–SERS15 | ✓  (fluidic trapping) | ✓  (local enrichment) | ✓ | ✓ | △  (optical microscopy-assisted) | △  (image-based estimation) | Integrates fluidic manipulation and SERS.  Some platforms support coarse morphological observation and size statistics. |
| Plasmonic micro or nanostructured substrates16 | △  (localized trapping) | ✓ | ✓ | ✓ | △  (validated by SEM) | △  (offline image analysis) | Enables particle enrichment at hotspots with signal enhancement, but morphology and size rely on external instrumentation. |
| Multimodal SERS + AI-based image analysis17 | ✗ | ✗ | ✓ | ✓ | ✓  (low-to-moderate resolution) | ✓  (statistical estimation) | Emerging approaches combine SERS with optical imaging to correlate composition, position, and size—but not at high resolution or truly *in-situ*. |

References

1. P. Rassolov, J. Ali, T. Siegrist, M. Humayun & H. Mohammadigoushki. Magnetophoresis of Paramagnetic Metal Ions in Porous Media. *Soft Matter*. **20,** 2496-2508 (2024).
2. Y. Dong, W. Ren, Y. Sun, X. Duan & C. Liu. Aggregation-Augmented Magnetism of Lanthanide-Doped Nanoparticles and Enabling Magnetic Levitation-Based Exosome Sensing. *Adv. Mater*. **36,** e2407013 (2024).
3. S. Ge, et al. Magnetic Levitation in Chemistry, Materials Science, and Biochemistry. *Angew. Chem. Int. Ed*. **59,** 17810-17855 (2020).
4. Washington J. Braida, Jason C. White, Francis J. Ferrandino & J. J. Pignatello. Effect of Solute Concentration on Sorption of Polyaromatic Hydrocarbons in Soil: Uptake Rates. *Environ. Sci. Technol*. **35,** 2765-2722 (2001).
5. Z. Wang, M. Sedighi & A. Lea-Langton. Filtration of Microplastic Spheres by Biochar: Removal Efficiency and Immobilisation Mechanisms. *Water Res.* **184,** 116165 (2020).
6. N. P. Ivleva. Chemical Analysis of Microplastics and Nanoplastics: Challenges, Advanced Methods, and Perspectives. *Chem. Rev*. **121,** 11886-11936 (2021).
7. T. Yang, J. Luo & B. Nowack. Characterization of Nanoplastics, Fibrils, and Microplastics Released during Washing and Abrasion of Polyester Textiles. *Environ. Sci. Technol*. **55,** 15873-15881 (2021).
8. L. F. Guerra, T. W. Muir & H. Yang. Single-Particle Dynamic Light Scattering: Shapes of Individual Nanoparticles. *Nano Lett.* **19,** 5530-5536 (2019).
9. Z. Wang, D. Pal, A. Pilechi & P. A. Ariya. Nanoplastics in Water: Artificial Intelligence-Assisted 4D Physicochemical Characterization and Rapid In Situ Detection. *Environ. Sci. Technol*. **58,** 8919-8931 (2024).
10. J. Li, H. Liu & J. Paul Chen. Microplastics in Freshwater Systems: A Review on Occurrence, Environmental Effects, and Methods for Microplastics Detection. *Water Res.* **137,** 362-374 (2018).
11. J. Y. Kim, et al. 3D Plasmonic Gold Nanopocket Structure for SERS Machine Learning‐Based Microplastic Detection. *Adv. Funct. Mater*. **34,** 2307584 (2023).
12. X. Ren, M. C. Breadmore & F. Maya. Bidimensional Dynamic Magnetic Levitation: Sequential Separation of Microplastics by Density and Size. *Anal. Chem*. **96,** 3259-3266 (2024).
13. X. Shi, et al. Capturing, Enriching and Detecting Nanoplastics in Water Based on Optical Manipulation, Surface-Enhanced Raman Scattering and Microfluidics. *Nat. Water*. **3,** 449-460 (2025).
14. J. Yang, et al. In Situ SERS Monitoring of Plasmon-Mediated Degradation of Microplastics. *J. Am. Chem. Soc*. **148,** 3462-3471 (2026).
15. T. Kumar, et al. High Throughput Viscoelastic Particle Focusing and Separation in Spiral Microchannels. *Sci. Rep.* **11,** 8467 (2021).
16. D. Ludescher, et al. Optical Sieve for Nanoplastic Detection, Sizing and Counting. *Nat. Photonics*. **19,** 1138-1145 (2025).
17. O. Guselnikova, et al. Pretreatment-Free SERS Sensing of Microplastics Using a Self-Attention-Based Neural Network on Hierarchically Porous Ag Foams. *Nat. Commun.* **15,** 4351 (2024).
